# Supplementary material
Source: PubMed Central journal article supplement (PMC4870380)
Supplement: NIHMS728742-supplement-supplement_1.pdf [file NIHMS728742-supplement-supplement_1.pdf]

**Supplementary Table 1. Protein coding genes located in 1 Mb windows across each of the 14 AA GWAS loci.** A list of the single most significant SNPs at each of the 14 GWAS loci (Table 1) was uploaded to Biomart in Ensembl to identify 225 protein coding SNPs, listed here. For three of the genes (SOWAHA, TEX40, PMEL), alternative gene names are sometimes used in public databases. Therefore, these alternative names were included in the uploaded gene list (rows 230-233), in addition to the official gene name. Gene positions are from build Hg38. Columns A-F (black header) list information retrieved from BIOMART. Columns G-K (gray header) report summary of results from this study. Indirect indicates that the protein is connected to the network by an intermediary protein (i.e. a protein not at an AA GWAS loci). Direct indicates that there is evidence the protein directly interacts with a protein from another AA GWAS loci.

| GWAS Locus | Gene Name  | Ensembl Gene ID | Chr | Gene Start (bp) | Gene End (bp) | DAVID recognized (1=yes) | Count of DAVID Pathways | Count of DAVID GO terms | DAPPLE results | Count of Analyses with positive results |
|------------|------------|-----------------|-----|-----------------|---------------|--------------------------|-------------------------|-------------------------|----------------|-----------------------------------------|
| 1p13.2     | MAGI3      | ENSG00000081026 | 1   | 113390749       | 113685923     | 1                        |                         |                         | indirect       | 1                                       |
| 1p13.2     | PHTF1      | ENSG00000116793 | 1   | 113696831       | 113759489     | 1                        |                         |                         |                | 0                                       |
| 1p13.2     | RSBN1      | ENSG00000081019 | 1   | 113761832       | 113812476     | 1                        |                         |                         | direct         | 1                                       |
| 1p13.2     | PTPN22     | ENSG00000134242 | 1   | 113813811       | 113871759     | 1                        |                         | 11                      | indirect       | 2                                       |
| 1p13.2     | BCL2L15    | ENSG00000188761 | 1   | 113878168       | 113887547     | 1                        |                         |                         |                | 0                                       |
| 1p13.2     | AP4B1      | ENSG00000134262 | 1   | 113894748       | 113905201     | 1                        |                         |                         | direct         | 1                                       |
| 1p13.2     | DCLRE1B    | ENSG00000118655 | 1   | 113905141       | 113914086     | 1                        |                         |                         | indirect       | 1                                       |
| 1p13.2     | HIPK1      | ENSG00000163349 | 1   | 113929192       | 113977804     | 1                        |                         | 2                       | indirect       | 2                                       |
| 1p13.2     | OLFML3     | ENSG00000116774 | 1   | 113979391       | 113982254     | 1                        |                         |                         | indirect       | 1                                       |
| 1p13.2     | SYT6       | ENSG00000134207 | 1   | 114089291       | 114153919     | 1                        |                         | 1                       | indirect       | 2                                       |
| 2q13       | AC108938.5 | ENSG00000257207 | 2   | 110402934       | 110473075     | 0                        |                         |                         |                | 0                                       |
| 2q13       | LIMS3L     | ENSG00000256671 | 2   | 110465051       | 110472934     | 0                        |                         |                         |                | 0                                       |
| 2q13       | RGPD6      | ENSG00000183054 | 2   | 110513812       | 110577185     | 1                        |                         |                         | indirect       | 1                                       |
| 2q13       | BUB1       | ENSG00000169679 | 2   | 110637698       | 110678114     | 1                        |                         | 1                       | direct         | 2                                       |
| 2q13       | ACOXL      | ENSG00000153093 | 2   | 110732573       | 111118222     | 1                        |                         |                         |                | 0                                       |
| 2q13       | BCL2L11    | ENSG00000153094 | 2   | 111119378       | 111168447     | 1                        |                         | 5                       | indirect       | 2                                       |
| 2q33.2     | ABI2       | ENSG00000138443 | 2   | 203328219       | 203447723     | 1                        |                         |                         | direct         | 1                                       |
| 2q33.2     | RAPH1      | ENSG00000173166 | 2   | 203394345       | 203535410     | 1                        |                         |                         | indirect       | 1                                       |
| 2q33.2     | CD28       | ENSG00000178562 | 2   | 203706475       | 203738912     | 1                        | 15                      | 39                      | indirect       | 3                                       |
| 2q33.2     | CTLA4      | ENSG00000163599 | 2   | 203867786       | 203873960     | 1                        | 4                       | 13                      | indirect       | 3                                       |
| 2q33.2     | ICOS       | ENSG00000163600 | 2   | 203936748       | 203961577     | 1                        | 5                       | 1                       |                | 2                                       |
| 4q27       | KIAA1109   | ENSG00000138688 | 4   | 122152333       | 122362758     | 1                        |                         |                         | indirect       | 1                                       |
| 4q27       | ADAD1      | ENSG00000164113 | 4   | 122378966       | 122429802     | 1                        |                         | 6                       |                | 1                                       |
| 4q27       | IL2        | ENSG00000109471 | 4   | 122451470       | 122456725     | 1                        | 15                      | 64                      | direct         | 3                                       |
| 4q27       | IL21       | ENSG00000138684 | 4   | 122612628       | 122621069     | 1                        | 1                       | 31                      | direct         | 3                                       |
| 4q27       | BBS12      | ENSG00000181004 | 4   | 122732702       | 122744943     | 1                        |                         |                         |                | 0                                       |
| 4q27       | FGF2       | ENSG00000138685 | 4   | 122826708       | 122898236     | 1                        |                         | 15                      | indirect       | 2                                       |
| 4q27       | NUDT6      | ENSG00000170917 | 4   | 122888697       | 122922968     | 1                        |                         |                         | indirect       | 1                                       |
| 4q27       | SPATA5     | ENSG00000145375 | 4   | 122923074       | 123319450     | 1                        |                         | 2                       | indirect       | 2                                       |
| 5q31.1     | P4HA2      | ENSG00000072682 | 5   | 132191838       | 132295315     | 1                        |                         |                         | indirect       | 1                                       |
| 5q31.1     | PDLIM4     | ENSG00000131435 | 5   | 132257671       | 132273454     | 1                        |                         |                         | indirect       | 1                                       |
| 5q31.1     | SLC22A4    | ENSG00000197208 | 5   | 132294443       | 132344206     | 1                        |                         |                         | indirect       | 1                                       |
| 5q31.1     | SLC22A5    | ENSG00000197375 | 5   | 132369752       | 132395614     | 1                        |                         |                         | indirect       | 1                                       |
| 5q31.1     | C5orf56    | ENSG00000197536 | 5   | 132410636       | 132476044     | 1                        |                         |                         |                | 0                                       |
| 5q31.1     | IRF1       | ENSG00000125347 | 5   | 132481609       | 132490798     | 1                        |                         | 18                      | indirect       | 2                                       |

| GWAS Locus | Gene Name         | Ensembl Gene ID | Chr | Gene Start (bp) | Gene End (bp) | DAVID recognized (1=yes) | Count of DAVID Pathways | Count of DAVID GO terms | DAPPLE results | Count of Analyses with positive results |
|------------|-------------------|-----------------|-----|-----------------|---------------|--------------------------|-------------------------|-------------------------|----------------|-----------------------------------------|
| 5q31.1     | IL5               | ENSG00000113525 | 5   | 132541444       | 132556838     | 1                        | 14                      | 34                      | direct         | 3                                       |
| 5q31.1     | RAD50             | ENSG00000113522 | 5   | 132556019       | 132646344     | 1                        |                         | 2                       | indirect       | 2                                       |
| 5q31.1     | IL13              | ENSG00000169194 | 5   | 132656263       | 132661110     | 1                        | 5                       | 23                      | direct         | 3                                       |
| 5q31.1     | IL4               | ENSG00000113520 | 5   | 132673986       | 132682676     | 1                        | 16                      | 53                      | direct         | 3                                       |
| 5q31.1     | KIF3A             | ENSG00000131437 | 5   | 132692628       | 132737638     | 1                        |                         |                         | indirect       | 1                                       |
| 5q31.1     | CCNI2             | ENSG00000205089 | 5   | 132747445       | 132754403     | 1                        |                         |                         |                | 0                                       |
| 5q31.1     | SEPT8             | ENSG00000164402 | 5   | 132750817       | 132807241     | 1                        |                         |                         | indirect       | 1                                       |
| 5q31.1     | SOWAHA            | ENSG00000198944 | 5   | 132813587       | 132816797     | 0                        |                         |                         |                | 0                                       |
| 5q31.1     | SHROOM1           | ENSG00000164403 | 5   | 132822141       | 132830898     | 1                        |                         |                         | direct         | 1                                       |
| 5q31.1     | GDF9              | ENSG00000164404 | 5   | 132861181       | 132866884     | 1                        |                         | 3                       | indirect       | 2                                       |
| 5q31.1     | UQCRQ             | ENSG00000164405 | 5   | 132866560       | 132868031     | 1                        |                         |                         | indirect       | 1                                       |
| 5q31.1     | LEAP2             | ENSG00000164406 | 5   | 132872322       | 132875046     | 1                        |                         |                         |                | 0                                       |
| 5q31.1     | AFF4              | ENSG00000072364 | 5   | 132875379       | 132963634     | 1                        |                         | 6                       | indirect       | 2                                       |
| 5q31.1     | ZCCHC10           | ENSG00000155329 | 5   | 132996985       | 133026604     | 1                        |                         |                         | indirect       | 1                                       |
| 5q31.1     | HSPA4             | ENSG00000170606 | 5   | 133051962       | 133106449     | 1                        | 1                       |                         | direct         | 2                                       |
| 6p21.32    | NOTCH4            | ENSG00000204301 | 6   | 32194843        | 32224067      | 1                        |                         | 12                      | indirect       | 2                                       |
| 6p21.32    | C6orf10           | ENSG00000204296 | 6   | 32288526        | 32371912      | 1                        |                         |                         |                | 0                                       |
| 6p21.32    | BTNL2             | ENSG00000204290 | 6   | 32393963        | 32407128      | 1                        |                         |                         |                | 0                                       |
| 6p21.32    | HLA-DRA           | ENSG00000204287 | 6   | 32439842        | 32445046      | 1                        | 19                      | 9                       | direct         | 3                                       |
| 6p21.32    | HLA-DRB5          | ENSG00000198502 | 6   | 32517343        | 32530287      | 1                        | 11                      | 3                       | direct         | 3                                       |
| 6p21.32    | HLA-DRB1          | ENSG00000196126 | 6   | 32552990        | 32589848      | 1                        | 19                      | 3                       | direct         | 3                                       |
| 6p21.32    | HLA-DQA1          | ENSG00000196735 | 6   | 32628179        | 32647062      | 1                        | 10                      | 3                       | direct         | 3                                       |
| 6p21.32    | HLA-DQB1          | ENSG00000179344 | 6   | 32659467        | 32668383      | 1                        | 10                      | 3                       | direct         | 3                                       |
| 6p21.32    | HLA-DQA2          | ENSG00000237541 | 6   | 32741342        | 32747215      | 1                        | 10                      | 3                       | direct         | 3                                       |
| 6p21.32    | HLA-DQB2          | ENSG00000232629 | 6   | 32756098        | 32763534      | 1                        |                         |                         |                | 0                                       |
| 6p21.32    | HLA-DOB           | ENSG00000241106 | 6   | 32812763        | 32817048      | 1                        | 10                      | 3                       | direct         | 3                                       |
| 6p21.32    | TAP2              | ENSG00000250264 | 6   | 32813767        | 32838822      | 1                        | 3                       | 9                       | direct         | 3                                       |
| 6p21.32    | PSMB8             | ENSG00000204264 | 6   | 32840717        | 32844703      | 1                        |                         | 8                       | direct         | 2                                       |
| 6p21.32    | PSMB9             | ENSG00000240065 | 6   | 32844136        | 32859585      | 1                        |                         | 8                       |                | 1                                       |
| 6p21.32    | TAP1              | ENSG00000168394 | 6   | 32845209        | 32853978      | 1                        | 3                       | 1                       | direct         | 3                                       |
| 6p21.32    | HLA-DMB           | ENSG00000242574 | 6   | 32934629        | 32941070      | 1                        | 10                      | 3                       | direct         | 3                                       |
| 6p21.32    | XXbac-BPG181M17.5 | ENSG00000248993 | 6   | 32937364        | 32953122      | 0                        |                         |                         |                | 0                                       |
| 6p21.32    | HLA-DMA           | ENSG00000204257 | 6   | 32948613        | 32969094      | 1                        | 10                      | 33                      | direct         | 3                                       |
| 6p21.32    | BRD2              | ENSG00000204256 | 6   | 32968660        | 32981505      | 1                        |                         | 2                       | indirect       | 2                                       |
| 6p21.32    | HLA-DOA           | ENSG00000204252 | 6   | 33004178        | 33009612      | 1                        | 10                      | 14                      | direct         | 3                                       |
| 6p21.32    | HLA-DPA1          | ENSG00000231389 | 6   | 33064569        | 33080775      | 1                        | 10                      | 3                       |                | 2                                       |
| 6p21.32    | HLA-DPB1          | ENSG00000223865 | 6   | 33075926        | 33087201      | 1                        | 10                      | 3                       | indirect       | 3                                       |
| 6p21.32    | COL11A2           | ENSG00000204248 | 6   | 33162681        | 33192499      | 1                        |                         |                         | indirect       | 1                                       |
| 6p21.32    | RXRβ              | ENSG00000204231 | 6   | 33193588        | 33200688      | 1                        |                         | 7                       | indirect       | 2                                       |
| 6p21.32    | SLC39A7           | ENSG00000112473 | 6   | 33200445        | 33204439      | 1                        |                         |                         | indirect       | 1                                       |
| 6p21.32    | HSD17B8           | ENSG00000204228 | 6   | 33204642        | 33206831      | 1                        |                         |                         |                | 0                                       |

| GWAS Locus | Gene Name  | Ensembl Gene ID | Chr | Gene Start (bp) | Gene End (bp) | DAVID recognized (1=yes) | Count of DAVID Pathways | Count of DAVID GO terms | DAPPLE results | Count of Analyses with positive results |
|------------|------------|-----------------|-----|-----------------|---------------|--------------------------|-------------------------|-------------------------|----------------|-----------------------------------------|
| 6q25.1     | PPIL4      | ENSG00000131013 | 6   | 149504733       | 149546038     | 1                        |                         | 1                       | indirect       | 2                                       |
| 6q25.1     | GINM1      | ENSG00000055211 | 6   | 149566294       | 149591748     | 0                        |                         |                         |                | 0                                       |
| 6q25.1     | KATNA1     | ENSG00000186625 | 6   | 149594873       | 149648972     | 1                        |                         | 1                       | indirect       | 2                                       |
| 6q25.1     | LATS1      | ENSG00000131023 | 6   | 149658153       | 149718256     | 1                        |                         | 1                       | indirect       | 2                                       |
| 6q25.1     | AL358852.1 | ENSG00000278899 | 6   | 149717621       | 149718888     | 0                        |                         |                         |                | 0                                       |
| 6q25.1     | NUP43      | ENSG00000120253 | 6   | 149724315       | 149749665     | 1                        |                         | 1                       | indirect       | 2                                       |
| 6q25.1     | PCMT1      | ENSG00000120265 | 6   | 149749443       | 149811420     | 1                        |                         |                         | indirect       | 1                                       |
| 6q25.1     | LRP11      | ENSG00000120256 | 6   | 149818798       | 149864026     | 1                        |                         |                         | indirect       | 1                                       |
| 6q25.1     | RAET1E     | ENSG00000164520 | 6   | 149883375       | 149898102     | 1                        |                         | 2                       | indirect       | 2                                       |
| 6q25.1     | RAET1G     | ENSG00000203722 | 6   | 149916878       | 149923121     | 1                        |                         | 2                       | direct         | 2                                       |
| 6q25.1     | ULBP2      | ENSG00000131015 | 6   | 149942000       | 149949235     | 1                        |                         | 6                       | indirect       | 2                                       |
| 6q25.1     | ULBP1      | ENSG00000111981 | 6   | 149964007       | 149973710     | 1                        |                         | 6                       | direct         | 2                                       |
| 6q25.1     | RAET1L     | ENSG00000155918 | 6   | 150018334       | 150025532     | 1                        |                         | 2                       |                | 1                                       |
| 6q25.1     | ULBP3      | ENSG00000131019 | 6   | 150063150       | 150069095     | 1                        |                         | 6                       | indirect       | 2                                       |
| 6q25.1     | PPP1R14C   | ENSG00000198729 | 6   | 150143076       | 150250357     | 1                        |                         |                         |                | 0                                       |
| 6q25.1     | IYD        | ENSG00000009765 | 6   | 150368892       | 150405969     | 1                        |                         |                         |                | 0                                       |
| 9q31.1     | NR4A3      | ENSG00000119508 | 9   | 99821855        | 99866891      | 1                        |                         | 7                       | indirect       | 2                                       |
| 9q31.1     | STX17      | ENSG00000136874 | 9   | 99906633        | 99970341      | 1                        |                         |                         |                | 0                                       |
| 9q31.1     | ERP44      | ENSG00000023318 | 9   | 99979179        | 100099040     | 1                        |                         | 1                       | direct         | 2                                       |
| 9q31.1     | INVS       | ENSG00000119509 | 9   | 100099256       | 100301000     | 1                        |                         |                         | indirect       | 1                                       |
| 9q31.1     | TEX10      | ENSG00000136891 | 9   | 100302077       | 100352939     | 1                        |                         |                         | indirect       | 1                                       |
| 10p15.1    | ASB13      | ENSG00000196372 | 10  | 5638867         | 5666595       | 1                        |                         |                         | indirect       | 1                                       |
| 10p15.1    | FAM208B    | ENSG00000108021 | 10  | 5684838         | 5763740       | 0                        |                         |                         |                | 0                                       |
| 10p15.1    | GDI2       | ENSG00000057608 | 10  | 5765223         | 5842132       | 1                        |                         |                         | indirect       | 1                                       |
| 10p15.1    | ANKRD16    | ENSG00000134461 | 10  | 5861617         | 5889906       | 1                        |                         |                         |                | 0                                       |
| 10p15.1    | FBXO18     | ENSG00000134452 | 10  | 5890203         | 5937594       | 1                        |                         |                         | indirect       | 1                                       |
| 10p15.1    | IL15RA     | ENSG00000134470 | 10  | 5937569         | 5978187       | 1                        | 2                       |                         | direct         | 2                                       |
| 10p15.1    | IL2RA      | ENSG00000134460 | 10  | 6010689         | 6062325       | 1                        | 4                       | 29                      | direct         | 3                                       |
| 10p15.1    | RBM17      | ENSG00000134453 | 10  | 6088987         | 6117457       | 1                        |                         |                         | direct         | 1                                       |
| 10p15.1    | PFKFB3     | ENSG00000170525 | 10  | 6144934         | 6235545       | 1                        |                         |                         | indirect       | 1                                       |
| 10p15.1    | PRKCQ      | ENSG00000065675 | 10  | 6427143         | 6580301       | 1                        | 1                       | 25                      | indirect       | 3                                       |
| 11q13      | MARK2      | ENSG00000072518 | 11  | 63838928        | 63911019      | 1                        |                         |                         | indirect       | 1                                       |
| 11q13      | RCOR2      | ENSG00000167771 | 11  | 63911221        | 63916844      | 1                        |                         |                         | indirect       | 1                                       |
| 11q13      | NAA40      | ENSG00000110583 | 11  | 63938959        | 63957328      | 1                        |                         |                         |                | 0                                       |
| 11q13      | COX8A      | ENSG00000176340 | 11  | 63974607        | 63976543      | 1                        |                         |                         |                | 0                                       |
| 11q13      | AP000721.4 | ENSG00000256100 | 11  | 63974620        | 63988346      | 0                        |                         |                         |                | 0                                       |
| 11q13      | OTUB1      | ENSG00000167770 | 11  | 63985853        | 64001811      | 1                        |                         | 1                       | indirect       | 2                                       |
| 11q13      | MACROD1    | ENSG00000133315 | 11  | 63998558        | 64166106      | 1                        |                         |                         |                | 0                                       |
| 11q13      | FLRT1      | ENSG00000126500 | 11  | 64103188        | 64119173      | 1                        |                         |                         |                | 0                                       |
| 11q13      | STIP1      | ENSG00000168439 | 11  | 64185272        | 64204543      | 1                        |                         |                         | direct         | 1                                       |
| 11q13      | FERMT3     | ENSG00000149781 | 11  | 64206678        | 64223886      | 1                        |                         |                         |                | 0                                       |

| GWAS Locus | Gene Name     | Ensembl Gene ID | Chr | Gene Start (bp) | Gene End (bp) | DAVID recognized (1=yes) | Count of DAVID Pathways | Count of DAVID GO terms | DAPPLE results | Count of Analyses with positive results |
|------------|---------------|-----------------|-----|-----------------|---------------|--------------------------|-------------------------|-------------------------|----------------|-----------------------------------------|
| 11q13      | TRPT1         | ENSG00000149743 | 11  | 64223799        | 64226254      | 1                        |                         |                         | indirect       | 1                                       |
| 11q13      | NUDT22        | ENSG00000149761 | 11  | 64225941        | 64230686      | 1                        |                         |                         |                | 0                                       |
| 11q13      | DNAJC4        | ENSG00000110011 | 11  | 64230278        | 64234286      | 1                        |                         | 1                       |                | 1                                       |
| 11q13      | VEGFB         | ENSG00000173511 | 11  | 64234538        | 64238793      | 1                        |                         | 3                       | indirect       | 2                                       |
| 11q13      | FKBP2         | ENSG00000173486 | 11  | 64241003        | 64244132      | 1                        |                         | 1                       | indirect       | 2                                       |
| 11q13      | PPP1R14B      | ENSG00000173457 | 11  | 64244480        | 64246941      | 1                        |                         |                         | indirect       | 1                                       |
| 11q13      | PLCB3         | ENSG00000149782 | 11  | 64251523        | 64269150      | 1                        |                         |                         | indirect       | 1                                       |
| 11q13      | BAD           | ENSG00000002330 | 11  | 64269830        | 64284704      | 1                        |                         | 16                      | indirect       | 2                                       |
| 11q13      | GPR137        | ENSG00000173264 | 11  | 64270062        | 64289500      | 1                        |                         |                         |                | 0                                       |
| 11q13      | KCNK4         | ENSG00000182450 | 11  | 64291302        | 64300031      | 1                        |                         |                         |                | 0                                       |
| 11q13      | TEX40         | ENSG00000219435 | 11  | 64300446        | 64304770      | 0                        |                         |                         |                | 0                                       |
| 11q13      | ESRRA         | ENSG00000173153 | 11  | 64305572        | 64316743      | 1                        |                         | 8                       | indirect       | 2                                       |
| 11q13      | TRMT112       | ENSG00000173113 | 11  | 64316460        | 64318084      | 1                        |                         |                         |                | 0                                       |
| 11q13      | PRDX5         | ENSG00000126432 | 11  | 64318088        | 64321811      | 1                        |                         |                         | indirect       | 1                                       |
| 11q13      | CCDC88B       | ENSG00000168071 | 11  | 64340223        | 64357534      | 1                        |                         |                         | indirect       | 1                                       |
| 11q13      | RPS6KA4       | ENSG00000162302 | 11  | 64359148        | 64372215      | 1                        |                         |                         | indirect       | 1                                       |
| 11q13      | SLC22A11      | ENSG00000168065 | 11  | 64555626        | 64572875      | 1                        |                         |                         | indirect       | 1                                       |
| 11q13      | SLC22A12      | ENSG00000197891 | 11  | 64590641        | 64602353      | 1                        |                         |                         | indirect       | 1                                       |
| 11q13      | NRXN2         | ENSG00000110076 | 11  | 64606174        | 64723188      | 1                        | 1                       |                         | indirect       | 2                                       |
| 11q13      | RASGRP2       | ENSG00000068831 | 11  | 64726911        | 64745456      | 1                        |                         | 1                       | indirect       | 2                                       |
| 11q13      | PYGM          | ENSG00000068976 | 11  | 64746389        | 64760297      | 1                        |                         |                         | indirect       | 1                                       |
| 11q13      | SF1           | ENSG00000168066 | 11  | 64764606        | 64778786      | 1                        |                         | 3                       | direct         | 2                                       |
| 11q13      | MAP4K2        | ENSG00000168067 | 11  | 64788818        | 64803241      | 1                        |                         | 1                       | indirect       | 2                                       |
| 11q13      | MEN1          | ENSG00000133895 | 11  | 64803510        | 64811294      | 1                        |                         | 19                      | indirect       | 2                                       |
| 11q13      | CDC42BPG      | ENSG00000171219 | 11  | 64823387        | 64844569      | 1                        |                         |                         | direct         | 1                                       |
| 11q13.5    | UVRAG         | ENSG00000198382 | 11  | 75815167        | 76143195      | 1                        |                         |                         |                | 0                                       |
| 11q13.5    | WNT11         | ENSG00000085741 | 11  | 76186325        | 76210736      | 1                        |                         |                         | indirect       | 1                                       |
| 11q13.5    | PRKRIR        | ENSG00000137492 | 11  | 76349956        | 76380971      | 1                        |                         | 1                       | indirect       | 2                                       |
| 11q13.5    | RP11-111M22.2 | ENSG00000179240 | 11  | 76381313        | 76414619      | 0                        |                         |                         |                | 0                                       |
| 11q13.5    | C11orf30      | ENSG00000158636 | 11  | 76444923        | 76553025      | 1                        |                         |                         | indirect       | 1                                       |
| 11q13.5    | LRRC32        | ENSG00000137507 | 11  | 76657524        | 76670747      | 1                        |                         |                         |                | 0                                       |
| 11q13.5    | TSKU          | ENSG00000182704 | 11  | 76782251        | 76798154      | 1                        |                         |                         | indirect       | 1                                       |
| 11q13.5    | ACER3         | ENSG00000078124 | 11  | 76860867        | 77026797      | 1                        |                         |                         |                | 0                                       |
| 11q13.5    | B3GNT6        | ENSG00000198488 | 11  | 77034398        | 77041973      | 1                        |                         |                         |                | 0                                       |
| 11q13.5    | CAPN5         | ENSG00000149260 | 11  | 77066932        | 77126155      | 1                        |                         |                         | indirect       | 1                                       |
| 12q13      | OR10P1        | ENSG00000175398 | 12  | 55636860        | 55637854      | 1                        |                         |                         |                | 0                                       |
| 12q13      | METTL7B       | ENSG00000170439 | 12  | 55681546        | 55684611      | 1                        |                         |                         |                | 0                                       |
| 12q13      | ITGA7         | ENSG00000135424 | 12  | 55684568        | 55716043      | 1                        |                         |                         | indirect       | 1                                       |
| 12q13      | RP11-644F5.10 | ENSG00000258311 | 12  | 55716036        | 55724703      | 0                        |                         |                         |                | 0                                       |
| 12q13      | BLOC1S1       | ENSG00000135441 | 12  | 55716037        | 55720087      | 1                        |                         |                         | indirect       | 1                                       |
| 12q13      | RDH5          | ENSG00000135437 | 12  | 55720367        | 55724705      | 1                        |                         |                         |                | 0                                       |

| GWAS Locus | Gene Name      | Ensembl Gene ID | Chr | Gene Start (bp) | Gene End (bp) | DAVID recognized (1=yes) | Count of DAVID Pathways | Count of DAVID GO terms | DAPPLE results | Count of Analyses with positive results |
|------------|----------------|-----------------|-----|-----------------|---------------|--------------------------|-------------------------|-------------------------|----------------|-----------------------------------------|
| 12q13      | CD63           | ENSG00000135404 | 12  | 55725323        | 55729707      | 1                        |                         |                         | direct         | 1                                       |
| 12q13      | GDF11          | ENSG00000135414 | 12  | 55743280        | 55757278      | 1                        |                         | 1                       | indirect       | 2                                       |
| 12q13      | SARNP          | ENSG00000205323 | 12  | 55752463        | 55817756      | 1                        |                         | 1                       | indirect       | 2                                       |
| 12q13      | RP11-76217.5   | ENSG00000257390 | 12  | 55757275        | 55827546      | 0                        |                         |                         |                | 0                                       |
| 12q13      | ORMDL2         | ENSG00000123353 | 12  | 55817919        | 55821879      | 1                        |                         |                         |                | 0                                       |
| 12q13      | DNAJC14        | ENSG00000135392 | 12  | 55820960        | 55830824      | 1                        |                         | 1                       | indirect       | 2                                       |
| 12q13      | MMP19          | ENSG00000123342 | 12  | 55835433        | 55842966      | 1                        |                         |                         |                | 0                                       |
| 12q13      | WIBG           | ENSG00000170473 | 12  | 55901413        | 55932618      | 1                        |                         | 7                       |                | 1                                       |
| 12q13      | DGKA           | ENSG00000065357 | 12  | 55927319        | 55954027      | 1                        |                         |                         | indirect       | 1                                       |
| 12q13      | PMEL           | ENSG00000185664 | 12  | 55954105        | 55973317      | 0                        |                         |                         |                | 0                                       |
| 12q13      | CDK2           | ENSG00000123374 | 12  | 55966769        | 55972784      | 1                        |                         | 8                       | direct         | 2                                       |
| 12q13      | RAB5B          | ENSG00000111540 | 12  | 55973913        | 55996683      | 1                        |                         |                         | indirect       | 1                                       |
| 12q13      | SUOX           | ENSG00000139531 | 12  | 55997180        | 56006641      | 1                        |                         |                         |                | 0                                       |
| 12q13      | IKZF4          | ENSG00000123411 | 12  | 56007659        | 56038435      | 1                        |                         |                         | indirect       | 1                                       |
| 12q13      | RPS26          | ENSG00000197728 | 12  | 56041853        | 56044675      | 1                        |                         |                         | indirect       | 1                                       |
| 12q13      | ERBB3          | ENSG00000065361 | 12  | 56079857        | 56103505      | 1                        |                         | 1                       | direct         | 2                                       |
| 12q13      | RP11-603J24.9  | ENSG00000257411 | 12  | 56101331        | 56109289      | 0                        |                         |                         |                | 0                                       |
| 12q13      | PA2G4          | ENSG00000170515 | 12  | 56104319        | 56113907      | 1                        |                         | 2                       | direct         | 2                                       |
| 12q13      | RPL41          | ENSG00000229117 | 12  | 56116586        | 56117943      | 1                        |                         |                         |                | 0                                       |
| 12q13      | ZC3H10         | ENSG00000135482 | 12  | 56118159        | 56127514      | 1                        |                         |                         | indirect       | 1                                       |
| 12q13      | ESYT1          | ENSG00000139641 | 12  | 56118250        | 56144671      | 1                        |                         |                         |                | 0                                       |
| 12q13      | MYL6B          | ENSG00000196465 | 12  | 56152256        | 56159647      | 1                        |                         |                         | indirect       | 1                                       |
| 12q13      | MYL6           | ENSG00000092841 | 12  | 56158161        | 56163496      | 1                        |                         |                         | indirect       | 1                                       |
| 12q13      | SMARCC2        | ENSG00000139613 | 12  | 56162983        | 56189567      | 1                        |                         | 7                       | direct         | 2                                       |
| 12q13      | RNF41          | ENSG00000181852 | 12  | 56202175        | 56221933      | 1                        |                         |                         | direct         | 1                                       |
| 12q13      | NABP2          | ENSG00000139579 | 12  | 56222015        | 56229854      | 0                        |                         |                         |                | 0                                       |
| 12q13      | SLC39A5        | ENSG00000139540 | 12  | 56230049        | 56237846      | 1                        |                         |                         |                | 0                                       |
| 12q13      | ANKRD52        | ENSG00000139645 | 12  | 56237807        | 56258391      | 1                        |                         |                         |                | 0                                       |
| 12q13      | COQ10A         | ENSG00000135469 | 12  | 56266858        | 56270966      | 1                        |                         |                         | indirect       | 1                                       |
| 12q13      | CS             | ENSG00000062485 | 12  | 56271699        | 56300392      | 1                        |                         |                         | indirect       | 1                                       |
| 12q13      | RP11-977G19.10 | ENSG00000144785 | 12  | 56285916        | 56316059      | 0                        |                         |                         |                | 0                                       |
| 12q13      | CNPY2          | ENSG00000257727 | 12  | 56309842        | 56316336      | 1                        |                         |                         | indirect       | 1                                       |
| 12q13      | PAN2           | ENSG00000135473 | 12  | 56316223        | 56334053      | 1                        |                         |                         | direct         | 1                                       |
| 12q13      | IL23A          | ENSG00000110944 | 12  | 56334174        | 56340410      | 1                        | 1                       | 5                       | direct         | 3                                       |
| 12q13      | STAT2          | ENSG00000170581 | 12  | 56341597        | 56360155      | 1                        | 1                       |                         | direct         | 2                                       |
| 12q13      | APOF           | ENSG00000175336 | 12  | 56360569        | 56362823      | 1                        |                         |                         | indirect       | 1                                       |
| 12q13      | TIMELESS       | ENSG00000111602 | 12  | 56416373        | 56449403      | 1                        |                         | 2                       | indirect       | 2                                       |
| 12q13      | MIP            | ENSG00000135517 | 12  | 56449502        | 56469166      | 1                        |                         |                         | indirect       | 1                                       |
| 12q13      | SPRYD4         | ENSG00000176422 | 12  | 56468567        | 56479707      | 1                        |                         |                         | indirect       | 1                                       |
| 12q13      | GLS2           | ENSG00000135423 | 12  | 56470944        | 56488414      | 1                        |                         |                         | indirect       | 1                                       |
| 12q13      | RBMS2          | ENSG00000076067 | 12  | 56521929        | 56596196      | 1                        |                         |                         |                | 0                                       |

| GWAS Locus | Gene Name     | Ensembl Gene ID | Chr | Gene Start (bp) | Gene End (bp) | DAVID recognized (1=yes) | Count of DAVID Pathways | Count of DAVID GO terms | DAPPLE results | Count of Analyses with positive results |
|------------|---------------|-----------------|-----|-----------------|---------------|--------------------------|-------------------------|-------------------------|----------------|-----------------------------------------|
| 12q24.12   | CUX2          | ENSG00000111249 | 12  | 111034024       | 111350554     | 1                        |                         |                         | indirect       | 1                                       |
| 12q24.12   | FAM109A       | ENSG00000198324 | 12  | 111360651       | 111369121     | 1                        |                         |                         | direct         | 1                                       |
| 12q24.12   | SH2B3         | ENSG00000111252 | 12  | 111405948       | 111451623     | 1                        |                         | 3                       | direct         | 2                                       |
| 12q24.12   | ATXN2         | ENSG00000204842 | 12  | 111452214       | 111599676     | 1                        |                         | 2                       | direct         | 2                                       |
| 12q24.12   | BRAP          | ENSG00000089234 | 12  | 111642146       | 111685986     | 1                        |                         |                         | indirect       | 1                                       |
| 12q24.12   | ACAD10        | ENSG00000111271 | 12  | 111686056       | 111757107     | 1                        |                         |                         |                | 0                                       |
| 12q24.12   | RP11-162P23.2 | ENSG00000257767 | 12  | 111753890       | 111791418     | 0                        |                         |                         |                | 0                                       |
| 12q24.12   | ALDH2         | ENSG00000111275 | 12  | 111766887       | 111809985     | 1                        |                         |                         | indirect       | 1                                       |
| 12q24.12   | MAPKAPK5      | ENSG00000089022 | 12  | 111841978       | 111896539     | 1                        |                         |                         | indirect       | 1                                       |
| 12q24.12   | TMEM116       | ENSG00000198270 | 12  | 111931282       | 112013185     | 1                        |                         |                         |                | 0                                       |
| 12q24.12   | ERP29         | ENSG00000089248 | 12  | 112013316       | 112023451     | 1                        |                         | 1                       | indirect       | 2                                       |
| 12q24.12   | NAA25         | ENSG00000111300 | 12  | 112026689       | 112109022     | 1                        |                         |                         |                | 0                                       |
| 16p13.13   | TEKT5         | ENSG00000153060 | 16  | 10627501        | 10694945      | 1                        |                         |                         |                | 0                                       |
| 16p13.13   | NUBP1         | ENSG00000103274 | 16  | 10743786        | 10769351      | 1                        |                         |                         |                | 0                                       |
| 16p13.13   | TVP23A        | ENSG00000166676 | 16  | 10760919        | 10818794      | 0                        |                         |                         |                | 0                                       |
| 16p13.13   | CIITA         | ENSG00000179583 | 16  | 10877198        | 10932281      | 1                        | 2                       | 8                       | indirect       | 3                                       |
| 16p13.13   | DEXI          | ENSG00000182108 | 16  | 10928891        | 10942460      | 1                        |                         |                         |                | 0                                       |
| 16p13.13   | CLEC16A       | ENSG00000038532 | 16  | 10944488        | 11182189      | 1                        |                         |                         |                | 0                                       |
| 16p13.13   | RMI2          | ENSG00000175643 | 16  | 11249619        | 11351762      | 0                        |                         |                         |                | 0                                       |
| 16p13.13   | SOCS1         | ENSG00000185338 | 16  | 11254405        | 11256179      | 1                        | 1                       | 4                       | direct         | 3                                       |
| 16p13.13   | TNP2          | ENSG00000178279 | 16  | 11267748        | 11269533      | 1                        |                         | 3                       |                | 1                                       |
| 16p13.13   | PRM3          | ENSG00000178257 | 16  | 11273218        | 11273641      | 1                        |                         | 3                       |                | 1                                       |
| 16p13.13   | PRM2          | ENSG00000122304 | 16  | 11275639        | 11276480      | 1                        |                         | 7                       |                | 1                                       |
| 16p13.13   | PRM1          | ENSG00000175646 | 16  | 11280836        | 11281350      | 1                        |                         | 8                       |                | 1                                       |
| 16p13.13   | CTD-3088G3.8  | ENSG00000188897 | 16  | 11359845        | 11523588      | 0                        |                         |                         |                | 0                                       |
| 16p13.13   | LITAF         | ENSG00000189067 | 16  | 11547722        | 11636381      | 1                        |                         |                         | indirect       | 1                                       |
| 5q31.1     | ANKRD43       | alt SOWAHA      | 5   | 132813587       | 132816797     | 1                        |                         |                         |                | 0                                       |
| 11q13      | TRAAK         | alt TEX40       | 11  | 64300446        | 64304770      | 0                        |                         |                         |                | 0                                       |
| 12q13      | SILV          | alt PMEL        | 12  | 55954105        | 55973317      | 1                        |                         |                         |                | 0                                       |

**Supplementary Table 2. Pathways that are significantly enriched by genes in AA GWAS loci (p<0.05).** Protein-coding genes located at GWAS loci were uploaded to the Database for Annotation, Visualization and Integrated Discovery (DAVID). Pathway analysis in the on-line computer program identified 27 pathways in Biocarta and KEGG that are enriched with AA GWAS genes. This evidence is being driven by 31 genes from eight loci.

| Category     | Term                                                  | Count | %    | PValue   | Genes                                                                                                                                                | List Total | Pop Hits | Pop Total | Fold Enrich | Bonferroni | Benjamini | FDR      |
|--------------|-------------------------------------------------------|-------|------|----------|------------------------------------------------------------------------------------------------------------------------------------------------------|------------|----------|-----------|-------------|------------|-----------|----------|
| KEGG_PATHWAY | hsa04672:Intestinal immune network for IgA production | 18    | 8.70 | 3.89E-19 | HLA-DQB1, IL4, IL5, HLA-DRB1, HLA-DMB, HLA-DQA2, HLA-DMA, HLA-DQA1, ICOS, HLA-DRB5, IL15RA, HLA-DPA1, HLA-DPB1, HLA-DOA, HLA-DOB, CD28, IL2, HLA-DRA | 85         | 49       | 5085      | 21.97599    | 4.36E-17   | 4.36E-17  | 4.41E-16 |
| KEGG_PATHWAY | hsa05330:Allograft rejection                          | 16    | 7.73 | 2.10E-18 | HLA-DQB1, IL4, IL5, HLA-DRB1, HLA-DMB, HLA-DMA, HLA-DQA2, HLA-DQA1, HLA-DRB5, HLA-DPA1, HLA-DPB1, HLA-DOA, HLA-DOB, CD28, HLA-DRA, IL2               | 85         | 36       | 5085      | 26.588235   | 2.35E-16   | 1.18E-16  | 2.38E-15 |
| KEGG_PATHWAY | hsa05310:Asthma                                       | 15    | 7.25 | 2.29E-18 | HLA-DQB1, IL4, IL5, HLA-DRB1, IL13, HLA-DMB, HLA-DMA, HLA-DQA2, HLA-DQA1, HLA-DRB5, HLA-DPA1, HLA-DPB1, HLA-DOA, HLA-DOB, HLA-DRA                    | 85         | 29       | 5085      | 30.943205   | 2.57E-16   | 8.57E-17  | 2.60E-15 |
| KEGG_PATHWAY | hsa05320:Autoimmune thyroid disease                   | 17    | 8.21 | 3.06E-17 | HLA-DQB1, IL4, IL5, HLA-DRB1, CTLA4, HLA-DMB, HLA-DMA, HLA-DQA2, HLA-DQA1, HLA-DRB5, HLA-DPA1, HLA-DPB1, HLA-DOA, HLA-DOB, CD28, IL2, HLA-DRA        | 85         | 51       | 5085      | 19.941176   | 3.42E-15   | 8.56E-16  | 3.47E-14 |
| KEGG_PATHWAY | hsa05332:Graft-versus-host disease                    | 14    | 6.76 | 1.51E-14 | HLA-DQB1, HLA-DRB1, HLA-DMB, HLA-DMA, HLA-DQA2, HLA-DQA1, HLA-DRB5, HLA-DPA1, HLA-DPB1, HLA-DOA, HLA-DOB, HLA-DRA, IL2, CD28                         | 85         | 39       | 5085      | 21.475113   | 1.69E-12   | 3.38E-13  | 1.71E-11 |
| KEGG_PATHWAY | hsa04940:Type I diabetes mellitus                     | 14    | 6.76 | 4.54E-14 | HLA-DQB1, HLA-DRB1, HLA-DMB, HLA-DMA, HLA-DQA2, HLA-DQA1, HLA-DRB5, HLA-DPA1, HLA-DPB1, HLA-DOA, HLA-DOB, HLA-DRA, IL2, CD28                         | 85         | 42       | 5085      | 19.941176   | 5.09E-12   | 8.48E-13  | 5.15E-11 |
| KEGG_PATHWAY | hsa04612:Antigen processing and presentation          | 16    | 7.73 | 2.55E-12 | CIITA, HLA-DQB1, HLA-DRB1, HLA-DMB, HLA-DMA, HLA-DQA2, HLA-DQA1, TAP2, TAP1, HLA-DRB5, HSPA4, HLA-DPA1, HLA-DPB1, HLA-DOA, HLA-DOB, HLA-DRA          | 85         | 83       | 5085      | 11.532247   | 2.85E-10   | 4.07E-11  | 2.89E-09 |

| Category     | Term                                                                                | Count | %    | PValue   | Genes                                                                                                                                       | List Total | Pop Hits | Pop Total | Fold Enrich | Bonferroni | Benjamini | FDR       |
|--------------|-------------------------------------------------------------------------------------|-------|------|----------|---------------------------------------------------------------------------------------------------------------------------------------------|------------|----------|-----------|-------------|------------|-----------|-----------|
| KEGG_PATHWAY | hsa05416:Viral myocarditis                                                          | 13    | 6.28 | 1.08E-09 | HLA-DQB1, HLA-DRB1, HLA-DMB, HLA-DMA, HLA-DQA2, HLA-DQA1, HLA-DRB5, HLA-DPA1, HLA-DPB1, HLA-DOA, HLA-DOB, CD28, HLA-DRA                     | 85         | 71       | 5085      | 10.953604   | 1.21E-07   | 1.51E-08  | 1.22E-06  |
| KEGG_PATHWAY | hsa04514:Cell adhesion molecules (CAMs)                                             | 16    | 7.73 | 2.38E-09 | HLA-DQB1, NRXN2, HLA-DRB1, CTLA4, HLA-DMB, HLA-DMA, HLA-DQA2, HLA-DQA1, ICOS, HLA-DRB5, HLA-DPA1, HLA-DPB1, HLA-DOA, HLA-DOB, CD28, HLA-DRA | 85         | 132      | 5085      | 7.2513369   | 2.67E-07   | 2.97E-08  | 2.70E-06  |
| KEGG_PATHWAY | hsa05322:Systemic lupus erythematosus                                               | 13    | 6.28 | 5.36E-08 | HLA-DQB1, HLA-DRB1, HLA-DMB, HLA-DMA, HLA-DQA2, HLA-DQA1, HLA-DRB5, HLA-DPA1, HLA-DPB1, HLA-DOA, HLA-DOB, CD28, HLA-DRA                     | 85         | 99       | 5085      | 7.855615    | 6.00E-06   | 6.00E-07  | 6.07E-05  |
| BIOCARTA     | h_ctla4Pathway:The Co-Stimulatory Signal During T-cell Activation                   | 6     | 2.90 | 1.27E-05 | HLA-DRB1, ICOS, CTLA4, HLA-DRA, CD28, IL2                                                                                                   | 27         | 19       | 1437      | 16.807018   | 7.87E-04   | 7.87E-04  | 0.0128108 |
| BIOCARTA     | h_th1th2Pathway:Th1/Th2 Differentiation                                             | 6     | 2.90 | 1.67E-05 | IL4, IL2RA, HLA-DRB1, HLA-DRA, CD28, IL2                                                                                                    | 27         | 20       | 1437      | 15.966667   | 0.0010361  | 5.18E-04  | 0.0168713 |
| BIOCARTA     | h_asbcellPathway:Antigen Dependent B Cell Activation                                | 5     | 2.42 | 3.79E-05 | IL4, HLA-DRB1, HLA-DRA, CD28, IL2                                                                                                           | 27         | 12       | 1437      | 22.175926   | 0.0023463  | 7.83E-04  | 0.038228  |
| BIOCARTA     | h_inflamPathway:Cytokines and Inflammatory Response                                 | 6     | 2.90 | 6.59E-05 | IL4, IL5, HLA-DRB1, IL13, HLA-DRA, IL2                                                                                                      | 27         | 26       | 1437      | 12.282051   | 0.0040759  | 0.0010205 | 0.0664552 |
| BIOCARTA     | h_mhcPathway:Antigen Processing and Presentation                                    | 4     | 1.93 | 5.81E-04 | HLA-DRB1, TAP2, TAP1, HLA-DRA                                                                                                               | 27         | 10       | 1437      | 21.288889   | 0.0353834  | 0.007179  | 0.5846416 |
| BIOCARTA     | h_il5Pathway:IL 5 Signaling Pathway                                                 | 4     | 1.93 | 5.81E-04 | IL4, IL5, HLA-DRB1, HLA-DRA                                                                                                                 | 27         | 10       | 1437      | 21.288889   | 0.0353834  | 0.007179  | 0.5846416 |
| KEGG_PATHWAY | hsa04630:Jak-STAT signaling pathway                                                 | 10    | 4.83 | 9.38E-04 | IL4, IL5, IL23A, IL2RA, SOCS1, IL15RA, IL13, IL21, STAT2, IL2                                                                               | 85         | 155      | 5085      | 3.8595825   | 0.0998058  | 0.0095131 | 1.0585524 |
| BIOCARTA     | h_tob1Pathway:Role of Tob in T-cell activation                                      | 4     | 1.93 | 0.002    | IL4, IL2RA, CD28, IL2                                                                                                                       | 27         | 14       | 1437      | 15.206349   | 0.0989364  | 0.0172134 | 1.6813924 |
| BIOCARTA     | h_cytokinePathway:Cytokine Network                                                  | 4     | 1.93 | 0.005    | IL4, IL5, IL13, IL2                                                                                                                         | 27         | 20       | 1437      | 10.644444   | 0.2621369  | 0.0424986 | 4.8276216 |
| BIOCARTA     | h_bbcellPathway:Bystander B Cell Activation                                         | 3     | 1.45 | 0.008    | HLA-DRB1, HLA-DRA, CD28                                                                                                                     | 27         | 8        | 1437      | 19.958333   | 0.4015723  | 0.062165  | 8.0175349 |
| BIOCARTA     | h_eosinophilsPathway:The Role of Eosinophils in the Chemokine Network of Allergy    | 3     | 1.45 | 0.008    | IL5, HLA-DRB1, HLA-DRA                                                                                                                      | 27         | 8        | 1437      | 19.958333   | 0.4015723  | 0.062165  | 8.0175349 |
| KEGG_PATHWAY | hsa04660:T cell receptor signaling pathway                                          | 7     | 3.38 | 0.008    | IL4, PRKCQ, IL5, ICOS, CTLA4, CD28, IL2                                                                                                     | 85         | 108      | 5085      | 3.877451    | 0.6151393  | 0.0764892 | 9.21218   |
| BIOCARTA     | h_nktPathway>Selective expression of chemokine receptors during T-cell polarization | 4     | 1.93 | 0.009    | IL4, IL5, CD28, IL2                                                                                                                         | 27         | 25       | 1437      | 8.5155556   | 0.4394231  | 0.0622856 | 8.9905866 |
| BIOCARTA     | h_GATA3pathway:GATA3 participate in activating the Th2 cytokine genes expression    | 3     | 1.45 | 0.013    | IL4, IL5, IL13                                                                                                                              | 27         | 10       | 1437      | 15.966667   | 0.5546599  | 0.0777064 | 12.336479 |



| Category     | Term                                                   | Count | %    | PValue | Genes                                        | List Total | Pop Hits | Pop Total | Fold Enrich | Bonferroni | Benjamini | FDR       |
|--------------|--------------------------------------------------------|-------|------|--------|----------------------------------------------|------------|----------|-----------|-------------|------------|-----------|-----------|
| KEGG_PATHWAY | hsa04640:Hematopoietic cell lineage                    | 6     | 2.90 | 0.013  | IL4, IL5, IL2RA, HLA-DRB1, HLA-DRB5, HLA-DRA | 85         | 86       | 5085      | 4.1737346   | 0.7781832  | 0.1093812 | 14.136904 |
| KEGG_PATHWAY | hsa05340:Primary immunodeficiency                      | 4     | 1.93 | 0.019  | CIITA, TAP2, ICOS, TAP1                      | 85         | 35       | 5085      | 6.8369748   | 0.8892836  | 0.1454659 | 19.968232 |
| BIOCARTA     | h_stemPathway:Regulation of hematopoiesis by cytokines | 3     | 1.45 | 0.029  | IL4, IL5, IL2                                | 27         | 15       | 1437      | 10.644444   | 0.8346624  | 0.1509312 | 25.393385 |

**Supplementary Table 3. Gene Ontology Terms representing biological processes that are significantly enriched by genes in AA GWAS loci ( $p < 0.05$ ).** Protein-coding genes located at GWAS loci were uploaded to the Database for Annotation, Visualization and Integrated Discovery (DAVID). Gene ontology (GO) term enrichment analysis identified 81 biological processes enriched with AA GWAS genes. This evidence is being driven by 83 genes from 14 GWAS loci. Some genes are assigned to multiple GO terms, as summarized in Supplementary Table 1, column 9.

| Term                                                                                                 | Count | %  | PValue   | Genes                                                                                                                                                                                                                                                                | List Total | Pop Hits | Pop Total | Fold Enrichment | Bonferroni | Benjamini | FDR       |
|------------------------------------------------------------------------------------------------------|-------|----|----------|----------------------------------------------------------------------------------------------------------------------------------------------------------------------------------------------------------------------------------------------------------------------|------------|----------|-----------|-----------------|------------|-----------|-----------|
| GO:0019882~antigen processing and presentation                                                       | 21    | 10 | 9.70E-21 | HLA-DQB1, HLA-DRB1, HLA-DMB, HLA-DMA, HLA-DQA2, PSMB8, HLA-DQA1, PSMB9, RAET1E, RAET1G, ULBP3, TAP2, ULBP1, ULBP2, RAET1L, HLA-DRB5, HLA-DPA1, HLA-DPB1, HLA-DOA, HLA-DOB, HLA-DRA                                                                                   | 169        | 83       | 13528     | 20.25           | 1.21E-17   | 1.21E-17  | 1.58E-17  |
| GO:0002504~antigen processing and presentation of peptide or polysaccharide antigen via MHC class II | 12    | 6  | 1.19E-13 | HLA-DQB1, HLA-DRB1, HLA-DRB5, HLA-DPA1, HLA-DPB1, HLA-DMB, HLA-DOA, HLA-DQA2, HLA-DOB, HLA-DMA, HLA-DQA1, HLA-DRA                                                                                                                                                    | 169        | 33       | 13528     | 29.11           | 1.48E-10   | 7.41E-11  | 1.93E-10  |
| GO:0006955~immune response                                                                           | 34    | 16 | 1.67E-11 | HLA-DQB1, HLA-DRB1, MAP4K2, IL13, HLA-DMB, HLA-DMA, RAET1E, IL23A, RAET1G, TAP2, ICOS, TAP1, RAET1L, HLA-DRB5, HLA-DPB1, HLA-DOA, HLA-DOB, CD28, CIITA, IL4, IL2RA, IL5, CTLA4, HLA-DQA2, PSMB8, HLA-DQA1, PSMB9, ULBP3, OTUB1, ULBP1, ULBP2, HLA-DPA1, IL2, HLA-DRA | 169        | 690      | 13528     | 3.94            | 2.07E-08   | 6.92E-09  | 2.71E-08  |
| GO:0051249~regulation of lymphocyte activation                                                       | 12    | 6  | 2.30E-06 | IL4, PRKCQ, IL5, IL2RA, CTLA4, IL13, BAD, HLA-DOA, IL21, HLA-DMA, CD28, IL2                                                                                                                                                                                          | 169        | 148      | 13528     | 6.49            | 0.0028605  | 7.16E-04  | 0.0037394 |
| GO:0051251~positive regulation of lymphocyte activation                                              | 10    | 5  | 3.18E-06 | IL4, PRKCQ, IL5, IL2RA, IL13, BAD, IL21, HLA-DMA, CD28, IL2                                                                                                                                                                                                          | 169        | 97       | 13528     | 8.25            | 0.0039477  | 7.91E-04  | 0.0051633 |
| GO:0050671~positive regulation of lymphocyte proliferation                                           | 8     | 4  | 4.94E-06 | IL4, PRKCQ, IL5, IL2RA, IL13, IL21, CD28, IL2                                                                                                                                                                                                                        | 169        | 55       | 13528     | 11.64           | 0.006127   | 0.0010238 | 0.0080225 |
| GO:0032946~positive regulation of mononuclear cell proliferation                                     | 8     | 4  | 5.59E-06 | IL4, PRKCQ, IL5, IL2RA, IL13, IL21, CD28, IL2                                                                                                                                                                                                                        | 169        | 56       | 13528     | 11.44           | 0.006927   | 9.93E-04  | 0.0090735 |
| GO:0070665~positive regulation of leukocyte proliferation                                            | 8     | 4  | 5.59E-06 | IL4, PRKCQ, IL5, IL2RA, IL13, IL21, CD28, IL2                                                                                                                                                                                                                        | 169        | 56       | 13528     | 11.44           | 0.006927   | 9.93E-04  | 0.0090735 |
| GO:0002696~positive regulation of leukocyte activation                                               | 10    | 5  | 6.64E-06 | IL4, PRKCQ, IL5, IL2RA, IL13, BAD, IL21, HLA-DMA, CD28, IL2                                                                                                                                                                                                          | 169        | 106      | 13528     | 7.55            | 0.0082284  | 0.0010323 | 0.0107852 |
| GO:0002694~regulation of leukocyte activation                                                        | 12    | 6  | 6.99E-06 | IL4, PRKCQ, IL5, IL2RA, CTLA4, IL13, BAD, HLA-DOA, IL21, HLA-DMA, CD28, IL2                                                                                                                                                                                          | 169        | 166      | 13528     | 5.79            | 0.0086601  | 9.66E-04  | 0.0113535 |
| GO:0050670~regulation of lymphocyte proliferation                                                    | 9     | 4  | 8.56E-06 | IL4, PRKCQ, IL5, IL2RA, CTLA4, IL13, IL21, CD28, IL2                                                                                                                                                                                                                 | 169        | 83       | 13528     | 8.68            | 0.0105922  | 0.0010643 | 0.0138998 |
| GO:0070663~regulation of leukocyte proliferation                                                     | 9     | 4  | 9.36E-06 | IL4, PRKCQ, IL5, IL2RA, CTLA4, IL13, IL21, CD28, IL2                                                                                                                                                                                                                 | 169        | 84       | 13528     | 8.58            | 0.011579   | 0.0010582 | 0.0152022 |
| GO:0032944~regulation of mononuclear cell proliferation                                              | 9     | 4  | 9.36E-06 | IL4, PRKCQ, IL5, IL2RA, CTLA4, IL13, IL21, CD28, IL2                                                                                                                                                                                                                 | 169        | 84       | 13528     | 8.58            | 0.011579   | 0.0010582 | 0.0152022 |
| GO:0050867~positive regulation of cell activation                                                    | 10    | 5  | 9.69E-06 | IL4, PRKCQ, IL5, IL2RA, IL13, BAD, IL21, HLA-DMA, CD28, IL2                                                                                                                                                                                                          | 169        | 111      | 13528     | 7.21            | 0.011986   | 0.0010044 | 0.0157397 |
| GO:0050865~regulation of cell activation                                                             | 12    | 6  | 1.16E-05 | IL4, PRKCQ, IL5, IL2RA, CTLA4, IL13, BAD, HLA-DOA, IL21, HLA-DMA, CD28, IL2                                                                                                                                                                                          | 169        | 175      | 13528     | 5.49            | 0.0142763  | 0.0011055 | 0.0187688 |

| Term                                                                                         | Count | %  | PValue   | Genes                                                                                                                                    | List Total | Pop Hits | Pop Total | Fold Enrichment | Bonferroni | Benjamini | FDR       |
|----------------------------------------------------------------------------------------------|-------|----|----------|------------------------------------------------------------------------------------------------------------------------------------------|------------|----------|-----------|-----------------|------------|-----------|-----------|
| GO:0050863~regulation of T cell activation                                                   | 10    | 5  | 1.49E-05 | IL4, PRKCQ, IL2RA, CTLA4, BAD, HLA-DOA, IL21, HLA-DMA, CD28, IL2                                                                         | 169        | 117      | 13528     | 6.84            | 0.0183262  | 0.0013203 | 0.024142  |
| GO:0002684~positive regulation of immune system process                                      | 13    | 6  | 4.19E-05 | IL4, PRKCQ, IL2RA, IL5, TAP2, PTPN22, IL13, BAD, IL21, HLA-DMA, CD28, IL2, HLA-DRA                                                       | 169        | 238      | 13528     | 4.37            | 0.0507599  | 0.0034669 | 0.0679795 |
| GO:0050870~positive regulation of T cell activation                                          | 8     | 4  | 4.28E-05 | IL4, PRKCQ, IL2RA, BAD, IL21, HLA-DMA, CD28, IL2                                                                                         | 169        | 76       | 13528     | 8.43            | 0.0518246  | 0.0033205 | 0.0694435 |
| GO:0042102~positive regulation of T cell proliferation                                       | 6     | 3  | 1.14E-04 | IL4, PRKCQ, IL2RA, IL21, CD28, IL2                                                                                                       | 169        | 39       | 13528     | 12.31           | 0.1320728  | 0.0082976 | 0.184735  |
| GO:0042129~regulation of T cell proliferation                                                | 7     | 3  | 1.16E-04 | IL4, PRKCQ, IL2RA, CTLA4, IL21, CD28, IL2                                                                                                | 169        | 62       | 13528     | 9.04            | 0.1343948  | 0.0079861 | 0.1882256 |
| GO:0045619~regulation of lymphocyte differentiation                                          | 7     | 3  | 1.27E-04 | IL2RA, CTLA4, BAD, HLA-DOA, IL21, HLA-DMA, IL2                                                                                           | 169        | 63       | 13528     | 8.89            | 0.1460619  | 0.0082759 | 0.2059052 |
| GO:0002478~antigen processing and presentation of exogenous peptide antigen                  | 4     | 2  | 2.88E-04 | TAP2, HLA-DOA, HLA-DMA, HLA-DRA                                                                                                          | 169        | 11       | 13528     | 29.11           | 0.3015847  | 0.017787  | 0.4674644 |
| GO:0045580~regulation of T cell differentiation                                              | 6     | 3  | 4.12E-04 | IL2RA, CTLA4, BAD, HLA-DOA, HLA-DMA, IL2                                                                                                 | 169        | 51       | 13528     | 9.42            | 0.4010909  | 0.0241161 | 0.6669709 |
| GO:0019884~antigen processing and presentation of exogenous antigen                          | 4     | 2  | 6.19E-04 | TAP2, HLA-DOA, HLA-DMA, HLA-DRA                                                                                                          | 169        | 14       | 13528     | 22.87           | 0.537239   | 0.0344185 | 1.0008235 |
| GO:0050871~positive regulation of B cell activation                                          | 5     | 2  | 7.09E-04 | IL4, IL5, IL13, BAD, IL2                                                                                                                 | 169        | 33       | 13528     | 12.13           | 0.5861737  | 0.0376348 | 1.1451547 |
| GO:0046649~lymphocyte activation                                                             | 10    | 5  | 8.50E-04 | IL4, IL23A, ULBP3, ULBP1, ULBP2, IRF1, PTPN22, HLA-DMA, CD28, IL2                                                                        | 169        | 199      | 13528     | 4.02            | 0.6529586  | 0.0431382 | 1.3720154 |
| GO:0045621~positive regulation of lymphocyte differentiation                                 | 5     | 2  | 8.90E-04 | IL2RA, BAD, IL21, HLA-DMA, IL2                                                                                                           | 169        | 35       | 13528     | 11.44           | 0.6696188  | 0.0433334 | 1.4353358 |
| GO:0042127~regulation of cell proliferation                                                  | 21    | 10 | 1.81E-03 | IL4, ESRRA, IL5, IL2RA, ERBB3, SF1, CTLA4, IL13, IL21, CDK2, MEN1, VEGFB, PRKCQ, TIMELESS, HIPK1, NOTCH4, GDF11, FGF2, PRKRIR, CD28, IL2 | 169        | 787      | 13528     | 2.14            | 0.895105   | 0.0830689 | 2.9005039 |
| GO:0030890~positive regulation of B cell proliferation                                       | 4     | 2  | 1.84E-03 | IL4, IL5, IL13, IL2                                                                                                                      | 169        | 20       | 13528     | 16.01           | 0.8983392  | 0.0811853 | 2.9401918 |
| GO:0030101~natural killer cell activation                                                    | 4     | 2  | 2.12E-03 | ULBP3, ULBP1, ULBP2, IL2                                                                                                                 | 169        | 21       | 13528     | 15.25           | 0.9288769  | 0.0900859 | 3.3917541 |
| GO:0045321~leukocyte activation                                                              | 10    | 5  | 3.26E-03 | IL4, IL23A, ULBP3, ULBP1, ULBP2, IRF1, PTPN22, HLA-DMA, CD28, IL2                                                                        | 169        | 242      | 13528     | 3.31            | 0.9826891  | 0.1305344 | 5.1574764 |
| GO:0050864~regulation of B cell activation                                                   | 5     | 2  | 3.64E-03 | IL4, IL5, IL13, BAD, IL2                                                                                                                 | 169        | 51       | 13528     | 7.85            | 0.9893125  | 0.1404012 | 5.7526796 |
| GO:0002495~antigen processing and presentation of peptide antigen via MHC class II           | 3     | 1  | 4.09E-03 | HLA-DOA, HLA-DMA, HLA-DRA                                                                                                                | 169        | 8        | 13528     | 30.02           | 0.9938697  | 0.1515459 | 6.434047  |
| GO:0019886~antigen processing and presentation of exogenous peptide antigen via MHC class II | 3     | 1  | 4.09E-03 | HLA-DOA, HLA-DMA, HLA-DRA                                                                                                                | 169        | 8        | 13528     | 30.02           | 0.9938697  | 0.1515459 | 6.434047  |
| GO:0048610~reproductive cellular process                                                     | 8     | 4  | 4.10E-03 | ADAD1, AFF4, SF1, GDF9, SYT6, PRM1, PRM2, TNP2                                                                                           | 169        | 162      | 13528     | 3.95            | 0.993976   | 0.1476434 | 6.4554076 |
| GO:0030888~regulation of B cell proliferation                                                | 4     | 2  | 4.91E-03 | IL4, IL5, IL13, IL2                                                                                                                      | 169        | 28       | 13528     | 11.44           | 0.9977982  | 0.1692357 | 7.676423  |

| Term                                                                         | Count | % | PValue   | Genes                                                                                                      | List Total | Pop Hits | Pop Total | Fold Enrichment | Bonferroni | Benjamini | FDR       |
|------------------------------------------------------------------------------|-------|---|----------|------------------------------------------------------------------------------------------------------------|------------|----------|-----------|-----------------|------------|-----------|-----------|
| GO:0048002~antigen processing and presentation of peptide antigen            | 4     | 2 | 4.91E-03 | TAP2, HLA-DOA, HLA-DMA, HLA-DRA                                                                            | 169        | 28       | 13528     | 11.44           | 0.9977982  | 0.1692357 | 7.676423  |
| GO:0048534~hemopoietic or lymphoid organ development                         | 10    | 5 | 5.20E-03 | MEN1, IL4, NOTCH4, IRF1, SH2B3, PTPN22, HLA-DMA, BCL2L11, CD28, IL2                                        | 169        | 260      | 13528     | 3.08            | 0.9984777  | 0.1737103 | 8.1201107 |
| GO:0042104~positive regulation of activated T cell proliferation             | 3     | 1 | 5.21E-03 | IL4, IL2RA, IL2                                                                                            | 169        | 9        | 13528     | 26.68           | 0.9984973  | 0.1695007 | 8.1356443 |
| GO:0008284~positive regulation of cell proliferation                         | 13    | 6 | 5.55E-03 | VEGFB, IL4, PRKCQ, IL2RA, IL5, HIPK1, NOTCH4, IL13, IL21, FGF2, CDK2, CD28, IL2                            | 169        | 414      | 13528     | 2.51            | 0.9990213  | 0.1750903 | 8.6484701 |
| GO:0045582~positive regulation of T cell differentiation                     | 4     | 2 | 7.16E-03 | IL2RA, BAD, HLA-DMA, IL2                                                                                   | 169        | 32       | 13528     | 10.01           | 0.9998695  | 0.2147405 | 11.020133 |
| GO:0010557~positive regulation of macromolecule biosynthetic process         | 17    | 8 | 7.41E-03 | IL4, CIITA, ESRRA, IL5, RXRB, NR4A3, IL21, CDK2, MEN1, PRKCQ, WIBG, NOTCH4, SMARCC2, IRF1, FGF2, CD28, IL2 | 169        | 654      | 13528     | 2.08            | 0.9999036  | 0.2159942 | 11.370757 |
| GO:0002520~immune system development                                         | 10    | 5 | 7.60E-03 | MEN1, IL4, NOTCH4, IRF1, SH2B3, PTPN22, HLA-DMA, BCL2L11, CD28, IL2                                        | 169        | 276      | 13528     | 2.90            | 0.999924   | 0.2158876 | 11.645726 |
| GO:0002697~regulation of immune effector process                             | 6     | 3 | 8.46E-03 | IL4, TAP2, IL13, IL21, CD28, IL2                                                                           | 169        | 101      | 13528     | 4.76            | 0.9999744  | 0.232254  | 12.89052  |
| GO:0030217~T cell differentiation                                            | 5     | 2 | 8.63E-03 | IRF1, PTPN22, HLA-DMA, CD28, IL2                                                                           | 169        | 65       | 13528     | 6.16            | 0.9999793  | 0.2312784 | 13.131522 |
| GO:0032270~positive regulation of cellular protein metabolic process         | 9     | 4 | 8.66E-03 | MEN1, IL4, IL5, WIBG, FGF2, PSMB8, PSMB9, CD28, IL2                                                        | 169        | 233      | 13528     | 3.09            | 0.9999799  | 0.2270466 | 13.168311 |
| GO:0030098~lymphocyte differentiation                                        | 6     | 3 | 9.17E-03 | IL4, IRF1, PTPN22, HLA-DMA, CD28, IL2                                                                      | 169        | 103      | 13528     | 4.66            | 0.9999895  | 0.2339595 | 13.895039 |
| GO:0046006~regulation of activated T cell proliferation                      | 3     | 1 | 9.32E-03 | IL4, IL2RA, IL2                                                                                            | 169        | 12       | 13528     | 20.01           | 0.9999913  | 0.2326855 | 14.112155 |
| GO:0030097~hemopoiesis                                                       | 9     | 4 | 9.44E-03 | MEN1, IL4, NOTCH4, IRF1, SH2B3, PTPN22, HLA-DMA, CD28, IL2                                                 | 169        | 236      | 13528     | 3.05            | 0.9999925  | 0.2307302 | 14.280537 |
| GO:0001775~cell activation                                                   | 10    | 5 | 9.68E-03 | IL4, IL23A, ULBP3, ULBP1, ULBP2, IRF1, PTPN22, HLA-DMA, CD28, IL2                                          | 169        | 287      | 13528     | 2.79            | 0.9999944  | 0.2312322 | 14.607042 |
| GO:0046425~regulation of JAK-STAT cascade                                    | 4     | 2 | 9.95E-03 | IL4, IL5, SOCS1, IL2                                                                                       | 169        | 36       | 13528     | 8.89            | 0.999996   | 0.2324892 | 14.985069 |
| GO:0051247~positive regulation of protein metabolic process                  | 9     | 4 | 0.011    | MEN1, IL4, IL5, WIBG, FGF2, PSMB8, PSMB9, CD28, IL2                                                        | 169        | 243      | 13528     | 2.96            | 0.9999989  | 0.2490306 | 16.42697  |
| GO:0031328~positive regulation of cellular biosynthetic process              | 17    | 8 | 0.011    | IL4, CIITA, ESRRA, IL5, RXRB, NR4A3, IL21, CDK2, MEN1, PRKCQ, WIBG, NOTCH4, SMARCC2, IRF1, FGF2, CD28, IL2 | 169        | 685      | 13528     | 1.99            | 0.9999992  | 0.2495058 | 16.77253  |
| GO:0009891~positive regulation of biosynthetic process                       | 17    | 8 | 0.013    | IL4, CIITA, ESRRA, IL5, RXRB, NR4A3, IL21, CDK2, MEN1, PRKCQ, WIBG, NOTCH4, SMARCC2, IRF1, FGF2, CD28, IL2 | 169        | 695      | 13528     | 1.96            | 0.9999999  | 0.2736695 | 18.836149 |
| GO:0002700~regulation of production of molecular mediator of immune response | 4     | 2 | 0.014    | IL4, IL13, IL21, IL2                                                                                       | 169        | 41       | 13528     | 7.81            | 1          | 0.2944572 | 20.721729 |
| GO:0032268~regulation of cellular protein metabolic process                  | 13    | 6 | 0.015    | SARNP, MEN1, IL4, ATXN2, PA2G4, IL5, WIBG, SOCS1, FGF2, PSMB8, CD28, IL2, PSMB9                            | 169        | 474      | 13528     | 2.20            | 1          | 0.3073774 | 22.065778 |

| Term                                                              | Count | % | PValue | Genes                                                                                                                    | List Total | Pop Hits | Pop Total | Fold Enrichment | Bonferroni | Benjamini | FDR       |
|-------------------------------------------------------------------|-------|---|--------|--------------------------------------------------------------------------------------------------------------------------|------------|----------|-----------|-----------------|------------|-----------|-----------|
| GO:0010604~positive regulation of macromolecule metabolic process | 19    | 9 | 0.020  | IL4, CIITA, ESRRA, IL5, RXRB, NR4A3, IL21, CDK2, PSMB8, PSMB9, MEN1, PRKCQ, WIBG, NOTCH4, SMARCC2, IRF1, FGF2, CD28, IL2 | 169        | 857      | 13528     | 1.77            | 1          | 0.3770624 | 27.925025 |
| GO:0042110~T cell activation                                      | 6     | 3 | 0.020  | IL23A, IRF1, PTPN22, HLA-DMA, CD28, IL2                                                                                  | 169        | 126      | 13528     | 3.81            | 1          | 0.3782878 | 28.468331 |
| GO:0042108~positive regulation of cytokine biosynthetic process   | 4     | 2 | 0.022  | PRKCQ, IRF1, IL21, CD28                                                                                                  | 169        | 48       | 13528     | 6.67            | 1          | 0.3902356 | 29.894299 |
| GO:0006457~protein folding                                        | 7     | 3 | 0.023  | ERP44, DNAJC14, ERP29, PPIL4, DNAJC4, HLA-DMA, FKBP2                                                                     | 169        | 177      | 13528     | 3.17            | 1          | 0.4072063 | 31.768076 |
| GO:0002521~leukocyte differentiation                              | 6     | 3 | 0.024  | IL4, IRF1, PTPN22, HLA-DMA, CD28, IL2                                                                                    | 169        | 131      | 13528     | 3.67            | 1          | 0.407513  | 32.258331 |
| GO:0045597~positive regulation of cell differentiation            | 8     | 4 | 0.024  | MEN1, IL5, IL2RA, BAD, IL21, FGF2, HLA-DMA, IL2                                                                          | 169        | 229      | 13528     | 2.80            | 1          | 0.4099345 | 32.927909 |
| GO:0040008~regulation of growth                                   | 10    | 5 | 0.027  | MEN1, VEGFB, ATXN2, PRKCQ, SOCS1, RASGRP2, GDF9, FGF2, BCL2L11, IL2                                                      | 169        | 341      | 13528     | 2.35            | 1          | 0.4335985 | 35.455312 |
| GO:0031401~positive regulation of protein modification process    | 7     | 3 | 0.029  | MEN1, IL4, IL5, FGF2, PSMB8, PSMB9, IL2                                                                                  | 169        | 187      | 13528     | 3.00            | 1          | 0.4597863 | 38.264438 |
| GO:0007286~spermatid development                                  | 4     | 2 | 0.029  | ADAD1, AFF4, PRM1, PRM2                                                                                                  | 169        | 54       | 13528     | 5.93            | 1          | 0.4559265 | 38.410539 |
| GO:0002706~regulation of lymphocyte mediated immunity             | 4     | 2 | 0.029  | IL4, TAP2, IL21, IL2                                                                                                     | 169        | 54       | 13528     | 5.93            | 1          | 0.4559265 | 38.410539 |
| GO:0048515~spermatid differentiation                              | 4     | 2 | 0.034  | ADAD1, AFF4, PRM1, PRM2                                                                                                  | 169        | 57       | 13528     | 5.62            | 1          | 0.4981003 | 42.760509 |
| GO:0045893~positive regulation of transcription, DNA-dependent    | 12    | 6 | 0.036  | MEN1, IL4, CIITA, ESRRA, IL5, RXRB, NOTCH4, SMARCC2, IRF1, NR4A3, FGF2, IL2                                              | 169        | 477      | 13528     | 2.01            | 1          | 0.5127574 | 44.639249 |
| GO:0048585~negative regulation of response to stimulus            | 5     | 2 | 0.036  | MEN1, IL2RA, SOCS1, CTLA4, IL2                                                                                           | 169        | 100      | 13528     | 4.00            | 1          | 0.5087523 | 44.780048 |
| GO:0046013~regulation of T cell homeostatic proliferation         | 2     | 1 | 0.037  | IL2RA, IL2                                                                                                               | 169        | 3        | 13528     | 53.36           | 1          | 0.5120496 | 45.601796 |
| GO:0007281~germ cell development                                  | 5     | 2 | 0.037  | ADAD1, AFF4, GDF9, PRM1, PRM2                                                                                            | 169        | 101      | 13528     | 3.96            | 1          | 0.5090473 | 45.823391 |
| GO:0051254~positive regulation of RNA metabolic process           | 12    | 6 | 0.038  | MEN1, IL4, CIITA, ESRRA, IL5, RXRB, NOTCH4, SMARCC2, IRF1, NR4A3, FGF2, IL2                                              | 169        | 481      | 13528     | 2.00            | 1          | 0.5093965 | 46.357578 |
| GO:0030261~chromosome condensation                                | 3     | 1 | 0.038  | PRM3, PRM1, PRM2                                                                                                         | 169        | 25       | 13528     | 9.61            | 1          | 0.5091757 | 46.832695 |
| GO:0007283~spermatogenesis                                        | 9     | 4 | 0.039  | BRD2, PRM3, ADAD1, AFF4, PRM1, PRM2, SPATA5, BCL2L11, TNP2                                                               | 169        | 308      | 13528     | 2.34            | 1          | 0.5072908 | 47.142165 |
| GO:0048232~male gamete generation                                 | 9     | 4 | 0.039  | BRD2, PRM3, ADAD1, AFF4, PRM1, PRM2, SPATA5, BCL2L11, TNP2                                                               | 169        | 308      | 13528     | 2.34            | 1          | 0.5072908 | 47.142165 |
| GO:0002703~regulation of leukocyte mediated immunity              | 4     | 2 | 0.040  | IL4, TAP2, IL21, IL2                                                                                                     | 169        | 61       | 13528     | 5.25            | 1          | 0.5167141 | 48.544358 |
| GO:0002637~regulation of immunoglobulin production                | 3     | 1 | 0.041  | IL4, IL13, IL2                                                                                                           | 169        | 26       | 13528     | 9.24            | 1          | 0.519811  | 49.333255 |
| GO:0000018~regulation of DNA recombination                        | 3     | 1 | 0.041  | IL4, RAD50, IL2                                                                                                          | 169        | 26       | 13528     | 9.24            | 1          | 0.519811  | 49.333255 |
| GO:0046427~positive regulation of JAK-STAT cascade                | 3     | 1 | 0.041  | IL4, IL5, IL2                                                                                                            | 169        | 26       | 13528     | 9.24            | 1          | 0.519811  | 49.333255 |

| Term                                            | Count | % | PValue | Genes                                                                                   | List Total | Pop Hits | Pop Total | Fold Enrichment | Bonferroni | Benjamini | FDR       |
|-------------------------------------------------|-------|---|--------|-----------------------------------------------------------------------------------------|------------|----------|-----------|-----------------|------------|-----------|-----------|
| GO:0045941~positive regulation of transcription | 13    | 6 | 0.049  | CIITA, MEN1, IL4, ESRRA, IL5, RXRB, SMARCC2, NOTCH4, IRF1, NR4A3, FGF2, CDK2, IL2       | 169        | 564      | 13528     | 1.85            | 1          | 0.5773834 | 55.492532 |
| GO:0022402~cell cycle process                   | 13    | 6 | 0.049  | MEN1, PA2G4, TIMELESS, KATNA1, SF1, BUB1, PRM1, NUP43, LATS1, RAD50, PSMB8, CDK2, PSMB9 | 169        | 565      | 13528     | 1.84            | 1          | 0.5764599 | 55.898506 |
